# Supplementary material for: Children with Early-Onset Psychosis Have Increased Burden of Rare GRIN2A Variants
Source: MDPI journal article supplement (doi:10.3390/genes14040779), 2023-03-23
Supplement: s1 [file s1]

Supplementary table S1. Housekeeping gene list.

|                |              |              |                 |              |             |
|----------------|--------------|--------------|-----------------|--------------|-------------|
| <b>MTFR1L</b>  | <b>PPARA</b> | <b>DHX30</b> | <b>HNRNPUL2</b> | <b>CHMP6</b> | <b>RPF2</b> |
| <b>KPNA6</b>   | CHCHD4       | PPP4R2       | MAP3K11         | PSMG2        | SYNJ2       |
| <b>STK40</b>   | SLTM         | TMEM39A      | PAAF1           | MIB1         | CHST12      |
| <b>RNF220</b>  | FAM96A       | KPNA1        | PANX1           | RPL17        | CXorf40A    |
| <b>TESK2</b>   | TRIP4        | SLC9A9       | FAM76B          | CC2D1A       | IFRD1       |
| <b>TMEM59</b>  | MORF4L1      | SLC33A1      | ATP5L           | SLC35E1      | LUZP6       |
| <b>AHCYL1</b>  | SNRNP25      | KPNA4        | EI24            | TBCB         | ADCK2       |
| <b>AP4B1</b>   | DNAJA3       | ZNF75D       | PRDM10          | ZNF347       | FAM160B2    |
| <b>TRIM33</b>  | DCTN5        | RUFY3        | WNK1            | RDH13        | TGS1        |
| <b>APH1A</b>   | ZNF668       | FNIP2        | C12orf4         | PPP6R1       | LACTB2      |
| <b>TOMM40L</b> | TK2          | FASTKD3      | MRPS35          | KIDINS220    | EIF3E       |
| <b>C1orf27</b> | DDX19B       | ERCC8        | C12orf73        | PREB         | TRAPPC9     |
| <b>SMYD3</b>   | NAA10        | AGGF1        | ANAPC7          | PPM1G        | TSTA3       |
| <b>HSPA14</b>  | CLUH         | CHD1         | UNC119B         | TTC27        | NDUFB6      |
| <b>PDSS1</b>   | CTDNEP1      | ATG12        | RNF34           | CRIP1        | ISCA1       |
| <b>DNAJB12</b> | MPDU1        | KDM3B        | RNASEH2B        | FARSB        | IARS        |
| <b>MRPS16</b>  | PER1         | HARS         | MYCBP2          | WDFY1        | DENND1A     |
| <b>POLR3A</b>  | RANGRF       | ANXA6        | TFDP1           | SNRPB        | PRRC2B      |
| <b>CCNJ</b>    | AATF         | SFXN1        | NEDD8           | CTSA         | NACC2       |
| <b>HPS1</b>    | MED1         | NSD1         | SNX6            | GART         | INPP5E      |
| <b>DNMBP</b>   | RAB5C        | MGAT4B       | PSEN1           | C22orf39     | ACOT9       |
| <b>DCLRE1A</b> | GHDC         | RANBP9       | YLPM1           | TXNRD2       | ELK1        |
| <b>RTF1</b>    | SPOP         | PFDN6        | DTWD1           | SGSM3        | GRIPAP1     |
| <b>FBXO3</b>   | MAP3K3       | TMEM30A      | INO80           | POLR3H       | STAG2       |

Supplementary Table S2. SKAT markers and allele frequencies of 10 SCHEMA genes.

| Chrom | POS       | REF   | alt    | gene symbol | max consequence          | carrier count | Allele freq | pVal Fisher | ref case count | het case count | hom case count | ref ctrl count | het ctrl count | hom ctrl count |
|-------|-----------|-------|--------|-------------|--------------------------|---------------|-------------|-------------|----------------|----------------|----------------|----------------|----------------|----------------|
| chr1  | 161017761 | C     | T      | ARHGA P30   | missense variant         | 4             | 0.02101     | 1           | 32             | 2              | 0              | 32             | 2              | 0              |
| chr1  | 161018224 | C     | T      | ARHGA P30   | missense variant         | 1             | 0.00424     | 1           | 33             | 0              | 0              | 33             | 1              | 0              |
| chr1  | 161018268 | T     | C      | ARHGA P30   | missense variant         | 2             | 0.0084      | 0.25        | 32             | 2              | 0              | 34             | 0              | 0              |
| chr1  | 161018374 | C     | T      | ARHGA P30   | missense variant         | 1             | 0.0042      | 1           | 34             | 0              | 0              | 33             | 1              | 0              |
| chr1  | 161018824 | C     | T      | ARHGA P30   | missense variant         | 1             | 0.0042      | 1           | 33             | 1              | 0              | 34             | 0              | 0              |
| chr1  | 161018896 | C     | T      | ARHGA P30   | missense variant         | 1             | 0.01681     | 1           | 33             | 1              | 0              | 34             | 0              | 0              |
| chr1  | 161023074 | T     | C      | ARHGA P30   | missense variant         | 1             | 0.01271     | 1           | 33             | 1              | 0              | 33             | 0              | 0              |
| chr1  | 231299470 | A     | AGCC   | TRIM67      | inframe insertion        | 0             | 0.0045      | 1           | 32             | 0              | 0              | 28             | 0              | 0              |
| chr1  | 231299470 | AGCC  | A      | TRIM67      | inframe deletion         | 2             | 0.00909     | 0.5         | 30             | 2              | 0              | 27             | 0              | 0              |
| chr1  | 231299533 | G     | A      | TRIM67      | missense variant         | 0             | 0.0045      | 1           | 32             | 0              | 0              | 28             | 0              | 0              |
| chr1  | 231344908 | A     | G      | TRIM67      | missense variant         | 2             | 0.0084      | 1           | 33             | 1              | 0              | 33             | 1              | 0              |
| chr16 | 9858054   | T     | TCGG   | GRIN2 A     | protein altering variant | 0             | 0.00446     | 1           | 34             | 0              | 0              | 31             | 0              | 0              |
| chr16 | 9858055   | T     | TG     | GRIN2 A     | frameshift variant       | 0             | 0.0045      | 1           | 34             | 0              | 0              | 31             | 0              | 0              |
| chr16 | 9858072   | G     | C      | GRIN2 A     | stop gained              | 0             | 0.00446     | 1           | 34             | 0              | 0              | 31             | 0              | 0              |
| chr16 | 9858074   | TTTGG | T      | GRIN2 A     | frameshift variant       | 0             | 0.00446     | 1           | 34             | 0              | 0              | 31             | 0              | 0              |
| chr16 | 9858079   | T     | TAAAAA | GRIN2 A     | inframe insertion        | 0             | 0.0045      | 1           | 34             | 0              | 0              | 31             | 0              | 0              |
| chr16 | 9858173   | G     | T      | GRIN2 A     | missense variant         | 2             | 0.01681     | 0.25        | 32             | 2              | 0              | 34             | 0              | 0              |
| chr16 | 9934641   | G     | T      | GRIN2 A     | missense variant         | 1             | 0.00424     | 1           | 33             | 1              | 0              | 33             | 0              | 0              |
| chr16 | 9934969   | G     | A      | GRIN2 A     | splice region variant    | 1             | 0.00424     | 1           | 33             | 1              | 0              | 33             | 0              | 0              |
| chr16 | 9943800   | G     | A      | GRIN2 A     | missense variant         | 0             | 0.0042      | 1           | 34             | 0              | 0              | 34             | 0              | 0              |
| chr16 | 10031844  | G     | C      | GRIN2 A     | missense variant         | 2             | 0.00855     | 0.5         | 32             | 2              | 0              | 32             | 0              | 0              |
| chr16 | 10032161  | T     | C      | GRIN2 A     | missense variant         | 1             | 0.0042      | 1           | 33             | 1              | 0              | 34             | 0              | 0              |
| chr16 | 30723148  | C     | T      | SRCAP       | splice region variant    | 1             | 0.0042      | 1           | 33             | 1              | 0              | 34             | 0              | 0              |
| chr16 | 30732143  | T     | C      | SRCAP       | missense variant         | 1             | 0.0042      | 1           | 33             | 1              | 0              | 34             | 0              | 0              |
| chr16 | 30732558  | C     | A      | SRCAP       | missense variant         | 0             | 0.0042      | 1           | 34             | 0              | 0              | 34             | 0              | 0              |
| chr16 | 30732644  | C     | T      | SRCAP       | missense variant         | 1             | 0.0042      | 1           | 33             | 1              | 0              | 34             | 0              | 0              |

|       |          |                        |      |           |                    |   |         |      |    |   |   |    |   |   |
|-------|----------|------------------------|------|-----------|--------------------|---|---------|------|----|---|---|----|---|---|
| chr16 | 30734337 | G                      | C    | SRCAP     | missense variant   | 1 | 0.0042  | 1    | 33 | 1 | 0 | 34 | 0 | 0 |
| chr16 | 30735348 | C                      | G    | SRCAP     | missense variant   | 1 | 0.01709 | 0.48 | 31 | 1 | 0 | 34 | 0 | 0 |
| chr16 | 30736263 | C                      | T    | SRCAP     | missense variant   | 1 | 0.0042  | 1    | 33 | 1 | 0 | 34 | 0 | 0 |
| chr16 | 30736370 | G                      | GC   | SRCAP     | frameshift variant | 1 | 0.0042  | 1    | 33 | 1 | 0 | 34 | 0 | 0 |
| chr16 | 30740333 | A                      | G    | SRCAP     | missense variant   | 1 | 0.0042  | 1    | 34 | 0 | 0 | 33 | 1 | 0 |
| chr16 | 30750063 | T                      | C    | SRCAP     | missense variant   | 0 | 0.0042  | 1    | 34 | 0 | 0 | 34 | 0 | 0 |
| chr16 | 30750614 | A                      | G    | SRCAP     | missense variant   | 0 | 0.0042  | 1    | 34 | 0 | 0 | 34 | 0 | 0 |
| chr17 | 17696987 | C                      | T    | RAI1      | missense variant   | 0 | 0.00917 | 1    | 24 | 0 | 0 | 34 | 0 | 0 |
| chr17 | 17697093 | CCAGCAGCAG             | C    | RAI1      | inframe deletion   | 1 | 0.00495 | 0.44 | 21 | 1 | 0 | 28 | 0 | 0 |
| chr17 | 17697093 | CCAGCAGCAGCAG          | C    | RAI1      | inframe deletion   | 1 | 0.02475 | 1    | 22 | 0 | 0 | 27 | 1 | 0 |
| chr17 | 17697093 | CCAGCAGCAGCAGCAGCAGCAG | C    | RAI1      | inframe deletion   | 2 | 0.0099  | 0.5  | 22 | 0 | 0 | 26 | 2 | 0 |
| chr17 | 17697093 | C                      | CCAG | RAI1      | inframe insertion  | 0 | 0.01485 | 1    | 22 | 0 | 0 | 28 | 0 | 0 |
| chr17 | 17697093 | CCAGCAG                | C    | RAI1      | inframe deletion   | 1 | 0.00495 | 0.44 | 21 | 1 | 0 | 28 | 0 | 0 |
| chr17 | 17697101 | AGCAG                  | A    | RAI1      | frameshift variant | 1 | 0.00521 | 0.45 | 20 | 1 | 0 | 26 | 0 | 0 |
| chr17 | 17697101 | AGCAGCAGCAG            | A    | RAI1      | frameshift variant | 1 | 0.005   | 0.43 | 20 | 1 | 0 | 28 | 0 | 0 |
| chr17 | 17697404 | C                      | T    | RAI1      | missense variant   | 3 | 0.01681 | 0.62 | 32 | 2 | 0 | 33 | 1 | 0 |
| chr17 | 17698006 | G                      | A    | RAI1      | missense variant   | 1 | 0.0042  | 1    | 33 | 1 | 0 | 34 | 0 | 0 |
| chr17 | 17698178 | C                      | T    | RAI1      | missense variant   | 1 | 0.0042  | 1    | 34 | 0 | 0 | 33 | 1 | 0 |
| chr17 | 17699141 | G                      | A    | RAI1      | missense variant   | 0 | 0.0042  | 1    | 34 | 0 | 0 | 34 | 0 | 0 |
| chr17 | 17699252 | G                      | A    | RAI1      | missense variant   | 0 | 0.0042  | 1    | 34 | 0 | 0 | 34 | 0 | 0 |
| chr17 | 17699992 | CGCA                   | C    | RAI1      | inframe deletion   | 1 | 0.0042  | 1    | 33 | 1 | 0 | 34 | 0 | 0 |
| chr17 | 17699992 | CGCAGCA                | C    | RAI1      | inframe deletion   | 1 | 0.0042  | 1    | 33 | 1 | 0 | 34 | 0 | 0 |
| chr17 | 17700037 | AAGG                   | A    | RAI1      | inframe deletion   | 0 | 0.0042  | 1    | 34 | 0 | 0 | 34 | 0 | 0 |
| chr19 | 47223986 | G                      | A    | STRN4     | missense variant   | 2 | 0.0084  | 0.25 | 32 | 2 | 0 | 34 | 0 | 0 |
| chr19 | 47226434 | C                      | T    | STRN4     | missense variant   | 4 | 0.01695 | 1    | 31 | 2 | 0 | 32 | 2 | 0 |
| chr21 | 45959256 | C                      | G    | KRTAP10-1 | missense variant   | 0 | 0.0084  | 1    | 34 | 0 | 0 | 34 | 0 | 0 |
| chr21 | 45959279 | C                      | T    | KRTAP10-1 | missense variant   | 1 | 0.0042  | 1    | 33 | 1 | 0 | 34 | 0 | 0 |
| chr21 | 45959292 | CA                     | TG   | KRTAP10-1 | missense variant   | 1 | 0.0042  | 1    | 34 | 0 | 0 | 33 | 1 | 0 |
| chr21 | 45959945 | T                      | G    | KRTAP10-1 | missense variant   | 0 | 0.0084  | 1    | 34 | 0 | 0 | 34 | 0 | 0 |

|       |               |      |   |               |                             |   |             |      |    |   |   |    |   |   |
|-------|---------------|------|---|---------------|-----------------------------|---|-------------|------|----|---|---|----|---|---|
| chr21 | 459599<br>53  | ACAG | A | KRTAP<br>10-1 | inframe<br>deletion         | 1 | 0.0042      | 1    | 33 | 1 | 0 | 34 | 0 | 0 |
| chr21 | 459599<br>72  | G    | T | KRTAP<br>10-1 | missens<br>e variant        | 3 | 0.0168<br>1 | 1    | 33 | 1 | 0 | 32 | 2 | 0 |
| chr4  | 151207<br>098 | C    | G | LRBA          | missens<br>e variant        | 1 | 0.0042      | 1    | 33 | 1 | 0 | 34 | 0 | 0 |
| chr4  | 151207<br>180 | G    | A | LRBA          | missens<br>e variant        | 0 | 0.0042      | 1    | 34 | 0 | 0 | 34 | 0 | 0 |
| chr4  | 151236<br>754 | T    | G | LRBA          | missens<br>e variant        | 3 | 0.0128<br>2 | 0.24 | 31 | 3 | 0 | 32 | 0 | 0 |
| chr4  | 151242<br>409 | T    | G | LRBA          | missens<br>e variant        | 1 | 0.0084      | 1    | 34 | 0 | 0 | 33 | 1 | 0 |
| chr4  | 151336<br>707 | C    | T | LRBA          | missens<br>e variant        | 1 | 0.0042      | 1    | 33 | 1 | 0 | 34 | 0 | 0 |
| chr4  | 151509<br>335 | A    | C | LRBA          | splice<br>region<br>variant | 1 | 0.0043<br>5 | 1    | 33 | 1 | 0 | 30 | 0 | 0 |
| chr4  | 151520<br>216 | G    | A | LRBA          | missens<br>e variant        | 4 | 0.0301<br>7 | 0.35 | 33 | 1 | 0 | 28 | 3 | 0 |
| chr4  | 151727<br>540 | C    | A | LRBA          | stop<br>gained              | 1 | 0.0042      | 1    | 34 | 0 | 0 | 33 | 1 | 0 |
| chr4  | 151791<br>682 | T    | C | LRBA          | missens<br>e variant        | 0 | 0.0042      | 1    | 34 | 0 | 0 | 34 | 0 | 0 |
| chr4  | 151793<br>903 | T    | C | LRBA          | missens<br>e variant        | 3 | 0.0252<br>1 | 1    | 33 | 1 | 0 | 32 | 2 | 0 |
| chr4  | 151827<br>146 | C    | A | LRBA          | splice<br>region<br>variant | 0 | 0.0043<br>1 | 1    | 34 | 0 | 0 | 31 | 0 | 0 |
| chr4  | 151829<br>580 | T    | C | LRBA          | missens<br>e variant        | 0 | 0.0042      | 1    | 34 | 0 | 0 | 34 | 0 | 0 |
| chr4  | 151837<br>660 | G    | C | LRBA          | missens<br>e variant        | 1 | 0.0042      | 1    | 34 | 0 | 0 | 33 | 1 | 0 |
| chr4  | 151850<br>224 | AGG  | A | LRBA          | splice<br>region<br>variant | 1 | 0.0042      | 1    | 34 | 0 | 0 | 33 | 1 | 0 |
| chr6  | 139563<br>937 | G    | A | TXLNB         | missens<br>e variant        | 3 | 0.0126<br>1 | 0.24 | 31 | 3 | 0 | 34 | 0 | 0 |
| chr6  | 139564<br>117 | G    | C | TXLNB         | missens<br>e variant        | 1 | 0.0042      | 1    | 33 | 1 | 0 | 34 | 0 | 0 |
| chr6  | 139569<br>043 | T    | C | TXLNB         | missens<br>e variant        | 0 | 0.0042      | 1    | 34 | 0 | 0 | 34 | 0 | 0 |
| chr6  | 139583<br>914 | C    | A | TXLNB         | splice<br>region<br>variant | 2 | 0.0168<br>1 | 1    | 33 | 1 | 0 | 33 | 1 | 0 |
| chr6  | 139610<br>006 | C    | T | TXLNB         | missens<br>e variant        | 2 | 0.0126<br>1 | 1    | 33 | 1 | 0 | 33 | 1 | 0 |
| chr7  | 150713<br>042 | C    | T | ATG9B         | missens<br>e variant        | 1 | 0.0042      | 1    | 34 | 0 | 0 | 33 | 1 | 0 |
| chr7  | 150713<br>218 | TCTC | T | ATG9B         | inframe<br>deletion         | 1 | 0.0042      | 1    | 34 | 0 | 0 | 33 | 1 | 0 |
| chr7  | 150714<br>163 | G    | A | ATG9B         | missens<br>e variant        | 1 | 0.0042      | 1    | 34 | 0 | 0 | 33 | 1 | 0 |
| chr7  | 150715<br>383 | C    | G | ATG9B         | missens<br>e variant        | 0 | 0.0042<br>7 | 1    | 34 | 0 | 0 | 33 | 0 | 0 |
| chr7  | 150720<br>997 | GCTC | G | ATG9B         | inframe<br>deletion         | 2 | 0.0084      | 0.25 | 32 | 2 | 0 | 34 | 0 | 0 |
| chr7  | 150721<br>014 | G    | A | ATG9B         | missens<br>e variant        | 2 | 0.0084      | 0.25 | 32 | 2 | 0 | 34 | 0 | 0 |

|      |           |      |    |       |                    |   |         |   |    |   |   |    |   |   |
|------|-----------|------|----|-------|--------------------|---|---------|---|----|---|---|----|---|---|
| chr7 | 150721026 | G    | C  | ATG9B | missense variant   | 1 | 0.0042  | 1 | 34 | 0 | 0 | 33 | 1 | 0 |
| chr7 | 150721057 | C    | T  | ATG9B | missense variant   | 0 | 0.0042  | 1 | 34 | 0 | 0 | 34 | 0 | 0 |
| chr7 | 150721090 | G    | A  | ATG9B | missense variant   | 1 | 0.02101 | 1 | 33 | 1 | 0 | 34 | 0 | 0 |
| chr7 | 150721396 | AAGG | A  | ATG9B | inframe deletion   | 0 | 0.00847 | 1 | 34 | 0 | 0 | 34 | 0 | 0 |
| chr7 | 150721483 | T    | TC | ATG9B | frameshift variant | 1 | 0.00442 | 1 | 31 | 1 | 0 | 32 | 0 | 0 |

Supplementary Table S3. Repeated SKAT *GRIN2A* analysis of cases vs. three control cohorts.

| Control cohort # | Chrom | Bp start | Bp stop  | Gene<br>Symbol | Num<br>Markers | P value |
|------------------|-------|----------|----------|----------------|----------------|---------|
| Control cohort 2 | chr16 | 9852375  | 10276611 | GRIN2A         | 8              | 0.017   |
| Control cohort 3 | chr16 | 9852375  | 10276611 | GRIN2A         | 8              | 0.018   |
| Control cohort 4 | chr16 | 9852375  | 10276611 | GRIN2A         | 8              | 0.06    |

Supplementary Table S4. SKAT markers and allele frequencies of *GRIN2A* variants in cases vs. three control cohorts.

control cohort 2

| Chrom            | POS      | REF | alt | max consequence       | carrier count | Allele freq | pVal Fisher | ref case count | het case count | hom case count | ref ctrl count | het ctrl count | hom ctrl count |
|------------------|----------|-----|-----|-----------------------|---------------|-------------|-------------|----------------|----------------|----------------|----------------|----------------|----------------|
| Control cohort 2 |          |     |     |                       |               |             |             |                |                |                |                |                |                |
| chr16            | 9858173  | G   | T   | missense variant      | 2             | 0.013       | 0.25        | 32             | 2              | 0              | 34             | 0              | 0              |
| chr16            | 9858502  | C   | G   | missense variant      | 0             | 0.006       | 1           | 34             | 0              | 0              | 34             | 0              | 0              |
| chr16            | 9858636  | G   | A   | missense variant      | 1             | 0.003       | 1           | 34             | 0              | 0              | 33             | 1              | 0              |
| chr16            | 9934641  | G   | T   | missense variant      | 1             | 0.003       | 1           | 33             | 1              | 0              | 34             | 0              | 0              |
| chr16            | 9934969  | G   | A   | splice region variant | 1             | 0.006       | 1           | 33             | 1              | 0              | 34             | 0              | 0              |
| chr16            | 10031844 | G   | C   | missense variant      | 2             | 0.006       | 0.25        | 32             | 2              | 0              | 34             | 0              | 0              |
| chr16            | 10032161 | T   | C   | missense variant      | 1             | 0.003       | 1           | 33             | 1              | 0              | 34             | 0              | 0              |
| chr16            | 10274192 | G   | A   | missense variant      | 0             | 0.004       | 1           | 27             | 0              | 0              | 34             | 0              | 0              |
|                  |          |     |     |                       |               |             |             |                |                |                |                |                |                |

Control cohort 3

| Chrom | POS      | REF | alt | max consequence       | carrier count | Allele freq | pVal Fisher | ref case count | het case count | hom case count | ref ctrl count | het ctrl count | hom ctrl count |
|-------|----------|-----|-----|-----------------------|---------------|-------------|-------------|----------------|----------------|----------------|----------------|----------------|----------------|
| chr16 | 9858173  | G   | T   | missense variant      | 2             | 0.013       | 0.25        | 32             | 2              | 0              | 34             | 0              | 0              |
| chr16 | 9858502  | C   | G   | missense variant      | 1             | 0.006       | 1           | 34             | 0              | 0              | 33             | 1              | 0              |
| chr16 | 9858636  | G   | A   | missense variant      | 0             | 0.003       | 1           | 34             | 0              | 0              | 34             | 0              | 0              |
| chr16 | 9934641  | G   | T   | missense variant      | 1             | 0.003       | 1           | 33             | 1              | 0              | 34             | 0              | 0              |
| chr16 | 9934969  | G   | A   | splice region variant | 1             | 0.006       | 1           | 33             | 1              | 0              | 33             | 0              | 0              |
| chr16 | 10031844 | G   | C   | missense variant      | 2             | 0.006       | 0.25        | 32             | 2              | 0              | 34             | 0              | 0              |
| chr16 | 10032161 | T   | C   | missense variant      | 1             | 0.003       | 1           | 33             | 1              | 0              | 34             | 0              | 0              |
| chr16 | 10274192 | G   | A   | missense variant      | 0             | 0.004       | 1           | 27             | 0              | 0              | 26             | 0              | 0              |
|       |          |     |     |                       |               |             |             |                |                |                |                |                |                |

Control cohort 4

| Chrom | POS      | REF | alt | max consequence       | carrier count | Allele freq | pVal Fisher | ref case count | het case count | hom case count | ref ctrl count | het ctrl count | hom ctrl count |
|-------|----------|-----|-----|-----------------------|---------------|-------------|-------------|----------------|----------------|----------------|----------------|----------------|----------------|
| chr16 | 9858173  | G   | T   | missense variant      | 4             | 0.013       | 1           | 32             | 2              | 0              | 31             | 2              | 0              |
| chr16 | 9858502  | C   | G   | missense variant      | 0             | 0.006       | 1           | 34             | 0              | 0              | 34             | 0              | 0              |
| chr16 | 9858636  | G   | A   | missense variant      | 0             | 0.003       | 1           | 34             | 0              | 0              | 33             | 0              | 0              |
| chr16 | 9934641  | G   | T   | missense variant      | 1             | 0.003       | 1           | 33             | 1              | 0              | 31             | 0              | 0              |
| chr16 | 9934969  | G   | A   | splice region variant | 1             | 0.006       | 1           | 33             | 1              | 0              | 33             | 0              | 0              |
| chr16 | 10031844 | G   | C   | missense variant      | 2             | 0.006       | 0.5         | 32             | 2              | 0              | 31             | 0              | 0              |
| chr16 | 10032161 | T   | C   | missense variant      | 1             | 0.003       | 1           | 33             | 1              | 0              | 33             | 0              | 0              |
| chr16 | 10274192 | G   | A   | missense variant      | 0             | 0.004       | 1           | 27             | 0              | 0              | 26             | 0              | 0              |
